# Supplementary material for: Design of lipidic platforms anchored within nanometric cavities by peptide hooks
Source: Royal Society of Chemistry journal article supplement (doi:10.1039/c6ra06054d), 2016-01-01
Supplement: c6ra06054d1.pdf [file c6ra06054d1.pdf]

## Design of lipidic platforms anchored within nanometric cavities by peptide hooks

G.M.L. Messina, M. De Zotti, R. Lettieri, E. Gatto, M. Venanzi,\* F. Formaggio, C. Toniolo and G. Marletta\*

### Supplementary Information

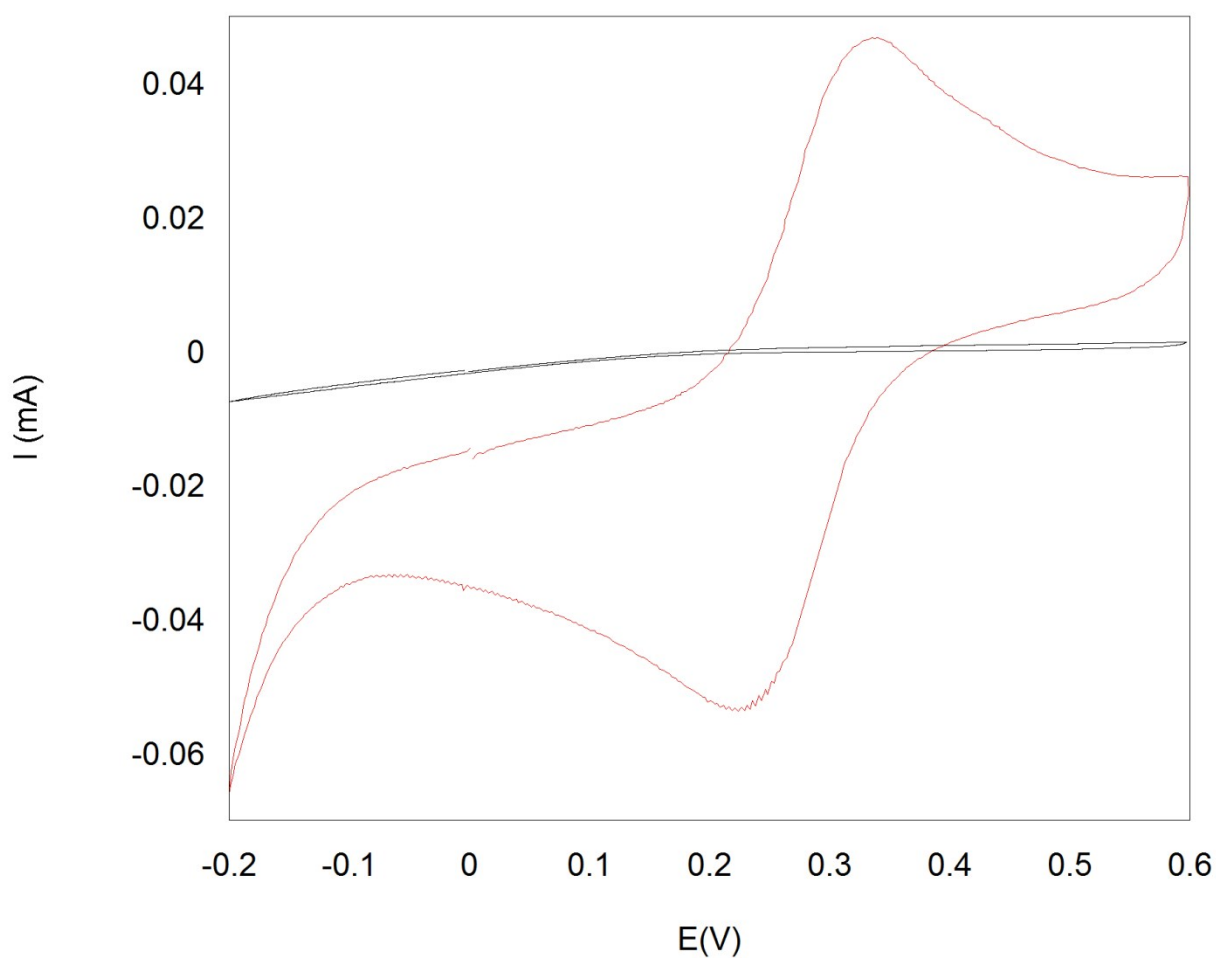

**Fig. 1 SI** Cyclic voltammetry blocking experiment with potassium ferricyanide [0.5 mM  $K_3Fe(CN)_6$  in 1 M KCl aqueous solution] using a bare gold electrode (red) or a PMMA/Au substrate (black) as the work electrode in a three-electrode set-up.
